# Supplementary material for: Evidence-Based Veterinary Medicine: A Tool for Evaluating the Healing Process After Surgical Treatment for Cranial Cruciate Ligament Rupture in Dogs
Source: PubMed Central journal article supplement (PMC6411761; doi:10.3389/fvets.2019.00065), 2019-03-05
Supplement: Table_1.pdf [file Table_1.pdf]

## *Supplementary Material*

### **Evidence-Based Veterinary Medicine: a tool for evaluating the healing process after surgical treatment for cranial cruciate ligament rupture in dogs**

**Stefania Pinna\*, Carlotta Lambertini, Lisa Grassato, Noemi Romagnoli**

\* **Correspondence:** Dr. Stefania Pinna: stefania.pinna@unibo.it

**Supplementary Table 1**– The BHSII (Bologna Healing Stifle Injury Index) is composed of two parts: the BHSII-OQ (BHSII – Owner Questionnaire) which consists of 3 domains with a total of 24 items and the BHSII-CR (BHSII – Clinical Record) which consists of 2 domains with a total of 10 items. Each item can be answered by a 5-point scale (0 to 4).

The forms have to be compiled by the pet-owner (part 1) and by the veterinarian (part 2), with a score from 0 (no problem) to 4 (severe alteration).

| <b>BHSII (Bologna Healing Stifle Injury Index)</b> |        |   |                     |             |           |
|----------------------------------------------------|--------|---|---------------------|-------------|-----------|
| Date (DD-MM-YY)                                    |        |   | Study ID            |             |           |
| Owner (Surname – Name)                             |        |   | Phone               |             |           |
| Breed                                              | Gender | M | F                   | Name of Dog |           |
| Diagnosis                                          | Limb   | R | L                   | Age         | Weight kg |
| Surgical technique                                 |        |   | Operative time days |             |           |

## Part 1. BHSII-OQ (Bologna Healing Stifle Injury Index – Owner Questionnaire)

Directions for the owner: for each of the following questions, circle the number which best reflects the condition of your dog in the past two weeks.

|                  |                                                                                                                                                              | SCORE                                                                                                                                                                                                                                                                                           |               |                  |              |               |
|------------------|--------------------------------------------------------------------------------------------------------------------------------------------------------------|-------------------------------------------------------------------------------------------------------------------------------------------------------------------------------------------------------------------------------------------------------------------------------------------------|---------------|------------------|--------------|---------------|
|                  |                                                                                                                                                              | Never<br>(0)                                                                                                                                                                                                                                                                                    | Rarely<br>(1) | Sometimes<br>(2) | Often<br>(3) | Always<br>(4) |
| <b>PAIN</b>      |                                                                                                                                                              |                                                                                                                                                                                                                                                                                                 |               |                  |              |               |
| P1.              | Has your dog changed its habits (i.e. where it sleeps, invitations to play, requests for walks) (answer affirmatively even for 1 change among those listed)? | 0                                                                                                                                                                                                                                                                                               | 1             | 2                | 3            | 4             |
| P2.              | Has it changed its response to everyday orders?                                                                                                              | 0                                                                                                                                                                                                                                                                                               | 1             | 2                | 3            | 4             |
| P3.              | Does it need to sit down after walks usual distance?                                                                                                         | 0                                                                                                                                                                                                                                                                                               | 1             | 2                | 3            | 4             |
| P4.              | Does it need to sit down after walks for bodily functions?                                                                                                   | 0                                                                                                                                                                                                                                                                                               | 1             | 2                | 3            | 4             |
| P5.              | Does it change its behavior when the weather changes?                                                                                                        | 0                                                                                                                                                                                                                                                                                               | 1             | 2                | 3            | 4             |
| P6.              | Does it lick or bite its stifle joint?                                                                                                                       | 0                                                                                                                                                                                                                                                                                               | 1             | 2                | 3            | 4             |
| P7.              | Has there been swelling in the stifle joint over the past two weeks?                                                                                         | 0                                                                                                                                                                                                                                                                                               | 1             | 2                | 3            | 4             |
| P8.              | Does it have difficulty going up stairs?                                                                                                                     | 0                                                                                                                                                                                                                                                                                               | 1             | 2                | 3            | 4             |
| P9.              | Does it have difficulty going down stairs?                                                                                                                   | 0                                                                                                                                                                                                                                                                                               | 1             | 2                | 3            | 4             |
| P10.             | Does it have difficulty getting in the car?                                                                                                                  | 0                                                                                                                                                                                                                                                                                               | 1             | 2                | 3            | 4             |
| P11.             | Does it have difficulty sitting down (i.e., turning around repeatedly)?                                                                                      | 0                                                                                                                                                                                                                                                                                               | 1             | 2                | 3            | 4             |
| P12.             | Does it whimper when it makes certain movements (lying down, getting up, turning around)?                                                                    | 0                                                                                                                                                                                                                                                                                               | 1             | 2                | 3            | 4             |
| <b>STIFFNESS</b> |                                                                                                                                                              | Never<br>(0)                                                                                                                                                                                                                                                                                    | Rarely<br>(1) | Sometimes<br>(2) | Often<br>(3) | Always<br>(4) |
| S1.              | Does your dog exhibit stiffness of movement in the morning or after a period of rest?                                                                        | 0                                                                                                                                                                                                                                                                                               | 1             | 2                | 3            | 4             |
| S2.              | Does it exhibit stiffness of movement after a long walk?                                                                                                     | 0                                                                                                                                                                                                                                                                                               | 1             | 2                | 3            | 4             |
| S3.              | When it is sitting down, does it hold the affected limb in an abnormal position?                                                                             | 0                                                                                                                                                                                                                                                                                               | 1             | 2                | 3            | 4             |
| S4.              | Does it move the affected limb in an abnormal way?                                                                                                           | 0                                                                                                                                                                                                                                                                                               | 1             | 2                | 3            | 4             |
| S5.              | What is its position when urinating: if male, does it put its weight on the affected limb? If female, does it crouch down normally?                          | 0-Always                                                                                                                                                                                                                                                                                        | 1-Often       | 2-Sometimes      | 3-Rarely     | 4-Never       |
| <b>FUNCTION</b>  |                                                                                                                                                              | Never<br>(0)                                                                                                                                                                                                                                                                                    | Rarely<br>(1) | Sometimes<br>(2) | Often<br>(3) | Always<br>(4) |
| F1.              | Does your dog limp when walking on soft ground (i.e. lawn, sand)?                                                                                            | 0                                                                                                                                                                                                                                                                                               | 1             | 2                | 3            | 4             |
| F2.              | Does it limp when walking on hard ground (i.e. asphalt, cement)?                                                                                             | 0                                                                                                                                                                                                                                                                                               | 1             | 2                | 3            | 4             |
| F3.              | Does it make abnormal movements when sitting down?                                                                                                           | 0                                                                                                                                                                                                                                                                                               | 1             | 2                | 3            | 4             |
| F4.              | Does it make abnormal movements when getting up?                                                                                                             | 0                                                                                                                                                                                                                                                                                               | 1             | 2                | 3            | 4             |
| F5.              | Does it behave strangely when circling around?                                                                                                               | 0                                                                                                                                                                                                                                                                                               | 1             | 2                | 3            | 4             |
| F6.              | How frequent is the limp?                                                                                                                                    | 0 – no limping at any time<br>1 – normal most of the time. Slight limp after rest/prolonged exercise<br>2 – normal 50% of the time. Moderate limp after rest/prolonged exercise<br>3 – normal for brief periods. Limping most of the time<br>4 – limping all the time                           |               |                  |              |               |
| F7.              | What type of limp is it?                                                                                                                                     | 0 – no limping at any time<br>1 – slightly abnormal gait, puts steady weight on the limb<br>2 – clearly abnormal gait, puts steady weight on the limb<br>3 – seriously abnormal, occasionally does not put weight on the limb when in movement<br>4 – never puts weight on the limb at any time |               |                  |              |               |

| <b>Part 2. BHSII-CR (Bologna Healing Stifle Injury Index – Clinical Record)</b>                                                                                      |                                                              |                                                                                                                                                                                                                       |                   |             |                       |              |
|----------------------------------------------------------------------------------------------------------------------------------------------------------------------|--------------------------------------------------------------|-----------------------------------------------------------------------------------------------------------------------------------------------------------------------------------------------------------------------|-------------------|-------------|-----------------------|--------------|
| Directions for the clinician: for each of the following items circle the number which reflects the severity of the signs revealed during the orthopedic examination. |                                                              |                                                                                                                                                                                                                       |                   |             |                       |              |
|                                                                                                                                                                      |                                                              |                                                                                                                                                                                                                       |                   |             | SCORE                 |              |
| <b>VISUAL EXAMINATION</b>                                                                                                                                            |                                                              |                                                                                                                                                                                                                       |                   |             |                       |              |
| V1.                                                                                                                                                                  | Lameness                                                     | 0 – none<br>1 – slight: slightly altered movement, function preserved<br>2 – altered movement, function preserved<br>3 – moderate: altered movement, function impaired<br>4 – severe: altered movement, function lost |                   |             |                       |              |
| V2.                                                                                                                                                                  | Gait in which limping is seen                                | 0 – no limping at any gait<br>1 – limping only when running<br>2 – limping when trotting<br>3 – limping even when walking (i.e., in all gaits)<br>4 – does not put weight on limb at any gait                         |                   |             |                       |              |
| V3.                                                                                                                                                                  | Abnormal gait (i.e. asymmetrical movement and/or jerky gait) | 0 – none                                                                                                                                                                                                              | 1 – slight        | 2 – mild    | 3 – moderate          | 4 – severe   |
| <b>MANUAL EXAMINATION</b>                                                                                                                                            |                                                              |                                                                                                                                                                                                                       |                   |             |                       |              |
| M1.                                                                                                                                                                  | Pain: palpation and passive movement                         | 0 – none                                                                                                                                                                                                              | 1 – slight        | 2 – mild    | 3 – moderate          | 4 – severe   |
| M2.                                                                                                                                                                  | Patello-femoral crepitus                                     | 0 – none                                                                                                                                                                                                              | 1 – slight        | 2 – mild    | 3 – moderate          | 4 – severe   |
| M3.                                                                                                                                                                  | Cranial drawer test                                          | 0=stable                                                                                                                                                                                                              | 1=1-3mm           | 2=4-6mm     | 3=7-9mm               | 4=10-12mm    |
| M4.                                                                                                                                                                  | Range of motion in extension                                 | 0=162°-158°                                                                                                                                                                                                           | 1=157°-153°       | 2=152°-148° | 3=147°-143°           | 4=142°-138   |
| M5.                                                                                                                                                                  | Range of motion in flexion                                   | 0=41°-45°                                                                                                                                                                                                             | 1=46°-50°         | 2=51°-55°   | 3=56°-60°             | 4=61°-65°    |
| M6.                                                                                                                                                                  | Tumefaction-effusion-edema                                   | 0 – none                                                                                                                                                                                                              | 1 – slight        | 2 – mild    | 3 – moderate          | 4 – severe   |
| M7.                                                                                                                                                                  | Muscle mass in thigh region                                  | 0 – normal                                                                                                                                                                                                            | 1 – almost normal | 2 – reduced | 3 – seriously reduced | 4 – atrophic |

These sheets can be used freely in clinical practice and research; for any other use (e.g., commercial use), please contact the authors.
