# Supplementary material for: Evidence-Based Veterinary Medicine: A Tool for Evaluating the Healing Process After Surgical Treatment for Cranial Cruciate Ligament Rupture in Dogs
Source: PubMed Central journal article supplement (PMC6411761; doi:10.3389/fvets.2019.00065), 2019-03-05
Supplement: Table_2.pdf [file Table_2.pdf]

## *Supplementary Material*

### **Evidence-Based Veterinary Medicine: a tool for evaluating the healing process after surgical treatment for cranial cruciate ligament rupture in dogs**

**Stefania Pinna\*, Carlotta Lambertini, Lisa Grassato, Noemi Romagnoli**

\* **Correspondence:** Dr. Stefania Pinna: stefania.pinna@unibo.it

**Supplementary Table 2** – The explanation of how the items of the BHSII-CR are assessed by the veterinarian following the steps of orthopedic examination.

| <b>Guidelines for orthopedic examination</b> |                           |                                                                                                                                                                           |
|----------------------------------------------|---------------------------|---------------------------------------------------------------------------------------------------------------------------------------------------------------------------|
| <b>ITEM</b>                                  |                           |                                                                                                                                                                           |
|                                              | <b>VISUAL EXAMINATION</b> |                                                                                                                                                                           |
| V1. V2. V3                                   | Lameness/abnormal gait    | Assessed by means of the observation of the gait of the animal when walking, trotting and running, graded on a scale from 0 to 4                                          |
|                                              | <b>MANUAL EXAMINATION</b> |                                                                                                                                                                           |
| M1.                                          | Pain                      | Assessed by means of the patient's reaction to palpation and passive movement of the stifle joint                                                                         |
| M2.                                          | Patello-femoral crepitus  | Assessed by means of palpation and passive movement                                                                                                                       |
| M3.                                          | Articular stability       | Assessed by means of the drawer test, measured from 0 to 12 mm                                                                                                            |
| M4.M5.                                       | Range of motion           | In extension and flexion, compared to the contralateral limb; measured in unsedated patients with a plastic sexagesimal goniometer, using 41°-162° as the reference range |
| M6.                                          | Periarticular tumefaction | Synovial effusion and edema assessed by means of palpation                                                                                                                |
| M7.                                          | Muscle mass of the thigh  | Quantified by means of palpation and measurement of the circumference as compared to the contralateral limb                                                               |
